# Supplementary material
Source: publisher site journal article supplement (https://www.dovepress.com/article/306504)
Supplement: Supplementary file 1 [file get_supplementary_file.php]

**Supplementary Table S1:** Additional questionnaires used in the larger baseline PainData data set.

| **Domain** | **Questionnaire** |
| --- | --- |
| Pain-related disability | Disability was assessed with the Pain Disability Index (PDI), which is a generic pain-related disability scale that assesses the degree to which pain interferes with daily activities (family/home responsibilities, recreational activities, social activities, occupational activities, sexual behavior, self-care activities and life-support activities) (1). Each item is constructed using an 11-point NRSs in which 0 = ‘no disability’ and 10 = ‘worst disability’. In the present study data was only collected on the 5 voluntary activities items, which yielded a 0 to 50 pain-related disability score as previous psychometric analyses have indicated that the obligatory activation subscale (self-care activities and life-support activities) has low internal reliability in this population (2). |
| Self-perceived general health | Health-related quality of life (QOL) was assessed using the 0 to 100 Visual Analog Scale (VAS) included in the EuroQol 5-D questionnaire with 100 indicating the best QOL (3). The use of the 0 to 100 VAS assessment of QOL has shown good correlations with the SF-36 scores, as well as with depression scores in patients with chronic conditions (4). |
| Fear of movement | Fear of movement was assessed using the 17-item Tampa Scale of Kinesiophobia (TSK) questionnaire (5). Each of the 17 items is rated on a 4-point Likert scale with 1 = ‘strongly disagree’ and 4 = ‘strongly agree’ getting a score between 17 and 68 with a higher score indicating higher levels of fear of movement/kinesiophobia. TSK has shown good reliability and acceptable concurrent validity in patients with chronic pain (6). |
| Pain catastrophization | Thoughts of pain catastrophization were assessed using the Pain Catastrophizing Scale (PCS) (7). The PCS instructs participants to indicate the degree to which they experience each of 13 thoughts or feelings when experiencing pain, on a 5-point Likert scale with 0 = not at all and 4 = all the time. The score is between 0 and 52 with a higher score indicating a higher level of pain catastrophizing. The PCS score has demonstrated acceptable test-retest reliability and internal consistency in patients with chronic pain (8). |
| Depression | Depressive symptoms were assessed using the Patient Health Questionnaire-9 (PHQ-9) (9). Nine items related to the core symptoms of depression are assessed on a 4-point Likert scale, ranging from 0 = ‘not at all’ to 3 = ‘nearly every day’ getting a score between 0 and 27 with a higher score indicating higher depression severity. The PHQ9 scale has demonstrated good validity and reliability [40], and has been widely used to measure depressive symptoms in chronic pain populations (10). |
| Anxiety | Anxiety symptoms were assessed with the Generalized Anxiety Disorder-7 (GAD-7) questionnaire (11). Seven items are assessed on a 4-point Likert scale, ranging from 0 = ‘not at all’ to 3 = ‘nearly every day’ getting a score between 0 and 21 with a higher score indicating higher anxiety severity. The GAD7 scale has demonstrated good validity and reliability (12), and has been widely used to measure anxiety symptoms in chronic pain populations (10). |
| Pain Acceptance | Acceptance of chronic pain: The 8-item Chronic Pain Acceptance Questionnaire (13) was used to assess accpetance of chronic pain. The CPAQ instructs participants to indicate the degree to which they experience each of 8 thoughts, feelings or behaviors when experiencing pain, on a 7-point Likert scale with 0 = never true and 6 = always true. The score is between 0 and 48 with a higher score indicating a higher level of pain acceptance. The CAPQ has demonstrated acceptable validity, test-retest reliability and internal consistency in patients with chronic pain (14). |
| Stress | Stress was assessed with the 10 items Cohens Perceived Stress Scale, which assesses to what extent patients experience life as uncontrollable, unpredictable and overwhelming (15) (REF). Ten items are assessed on a 5-point Likert scale ranging from 0 = ‘Never’ to 4 = ‘Very often’. The Danish version has demonstrated good validity (16). |
| Self-efficacy | Pain self-efficacy was assessed with the 2 items Pain Self-Efficacy Questionnaire (17). The PSEQ2 instructs participants to indicate how confident they are that they can do some form of work and live a normal life style despite pain on a 7-point Likert scale with 0 = not at all confident and 6 = completely confident. The score is between 0 and 12 with a higher score indicating a higher level of pain self-efficacy. The PSEQ2 is a robust measure of pain self-efficacy with sound validity, internal consistency, test-retest reliability, and sensitivity to change (17). |

**References**

1. Pollard CA. Preliminary validity study of the pain disability index. Perceptual and motor skills. 1984;59(3):974.

2. Soer R, Koke AJ, Vroomen PC, Stegeman P, Smeets RJ, Coppes MH, et al. Extensive validation of the pain disability index in 3 groups of patients with musculoskeletal pain. Spine. 2013;38(9):E562-8.

3. EuroQol--a new facility for the measurement of health-related quality of life. Health Policy. 1990;16(3):199-208.

4. Schrag A, Selai C, Jahanshahi M, Quinn NP. The EQ-5D--a generic quality of life measure-is a useful instrument to measure quality of life in patients with Parkinson's disease. J Neurol Neurosurg Psychiatry. 2000;69(1):67-73.

5. Kori SH, Miller RP, Todd DD. Kinisophobia: a new view of chronic pain behavior. Pain Manag. 1990;1:35-43.

6. Swinkels-Meewisse EJ, Swinkels RA, Verbeek AL, Vlaeyen JW, Oostendorp RA. Psychometric properties of the Tampa Scale for kinesiophobia and the fear-avoidance beliefs questionnaire in acute low back pain. Man Ther. 2003;8(1):29-36.

7. Sullivan MJ, Bishop SR, Pivik J. The pain catastrophizing scale: development and validation. Psychol Assess. 1995;7:524-32.

8. Fernandes L, Storheim K, Lochting I, Grotle M. Cross-cultural adaptation and validation of the Norwegian pain catastrophizing scale in patients with low back pain. BMC musculoskeletal disorders. 2012;13:111.

9. Kroenke K, Spitzer RL, Williams JB. The PHQ-9: validity of a brief depression severity measure. J Gen Intern Med. 2001;16(9):606-13.

10. Bair MJ, Wu J, Damush TM, Sutherland JM, Kroenke K. Association of depression and anxiety alone and in combination with chronic musculoskeletal pain in primary care patients. Psychosomatic medicine. 2008;70(8):890-7.

11. Spitzer RL, Kroenke K, Williams JB, Löwe B. A brief measure for assessing generalized anxiety disorder: the GAD-7. Arch Intern Med. 2006;166(10):1092-7.

12. Seo JG, Park SP. Validation of the Generalized Anxiety Disorder-7 (GAD-7) and GAD-2 in patients with migraine. J Headache Pain. 2015;16:97.

13. McCracken LM, Vowles KE, Eccleston C. Acceptance of chronic pain: component analysis and a revised assessment method. Pain. 2004;107(1-2):159-66.

14. Reneman MF, Dijkstra A, Geertzen JH, Dijkstra PU. Psychometric properties of Chronic Pain Acceptance Questionnaires: a systematic review. European journal of pain (London, England). 2010;14(5):457-65.

15. Cohen S, Kamarck T, Mermelstein R. A global measure of perceived stress. J Health Soc Behav. 1983;24(4):385-96.

16. Eskildsen A, Dalgaard VL, Nielsen KJ, Andersen JH, Zachariae R, Olsen LR, et al. Cross-cultural adaptation and validation of the Danish consensus version of the 10-item Perceived Stress Scale. Scand J Work Environ Health. 2015;41(5):486-90.

17. Nicholas MK, McGuire BE, Asghari A. A 2-item short form of the Pain Self-efficacy Questionnaire: development and psychometric evaluation of PSEQ-2. The journal of pain : official journal of the American Pain Society. 2015;16(2):153-63.
